# Supplementary material for: XPC deficiency increases risk of hematologic malignancies through mutator phenotype and characteristic mutational signature
Source: PubMed Central journal article supplement (PMC7672101; doi:10.1038/s41467-020-19633-9), 2020-11-17
Supplement: 41467_2020_19633_MOESM4_ESM.pdf [file 41467_2020_19633_MOESM4_ESM.pdf]

## **Description of Additional Supplementary Files**

File Name: Supplementary Data 1

Description: Matrixes of single, double substitutions and indels in different mutational classes.

File Name: Supplementary Software 1

Description: Supplementary code used to calculate probability of mutation clusterisation.
